# Supplementary material for: Controls on dissolved organic matter (DOM) degradation in a headwater stream: the influence of photochemical and hydrological conditions in determining light-limitation or substrate-limitation of photo-degradation
Source: Copernicus journal article supplement (doi:10.5194/bg-12-6669-2015), 2015-11-24
Supplement: Supplementary file 1 [file bg-12-6669-2015-supplement.pdf]

Supplement of Biogeosciences, 12, 6669–6685, 2015  
<http://www.biogeosciences.net/12/6669/2015/>  
doi:10.5194/bg-12-6669-2015-supplement  
© Author(s) 2015. CC Attribution 3.0 License.

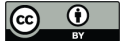

Biogeosciences  Open Access

*Supplement of*

## **Controls on dissolved organic matter (DOM) degradation in a headwater stream: the influence of photochemical and hydrological conditions in determining light-limitation or substrate-limitation of photo-degradation**

**R. M. Cory et al.**

*Correspondence to:* R. M. Cory ([rmcory@umich.edu](mailto:rmcory@umich.edu))

The copyright of individual parts of the supplement might differ from the CC-BY 3.0 licence.

## Supporting Information – Figures and Data

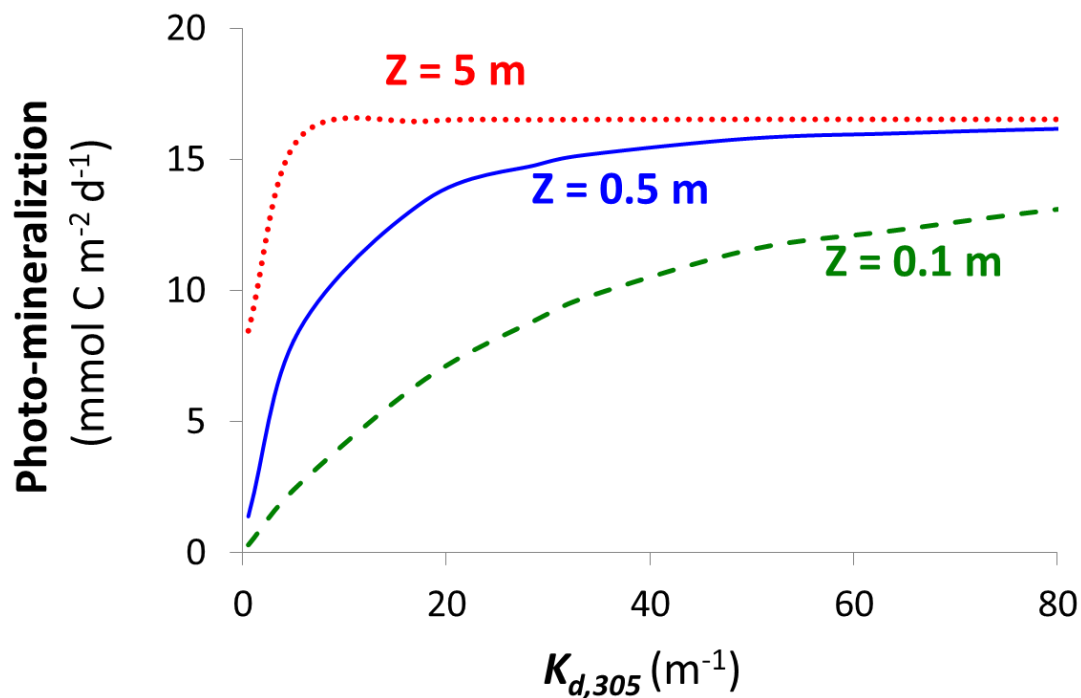

**Fig. S1.** The dependence of water column rates of photo-mineralization as a function of  $K_d$ , which increases with increasing CDOM. Three situations with varying depth ( $z$ ) of the water column are shown. In all but the shallowest water columns, the photo-mineralization rate asymptotes at relatively low  $K_d$  values – the range of  $K_d$  at 305 nm measured in Imnavait Creek was 39 to 63 m<sup>-1</sup>.

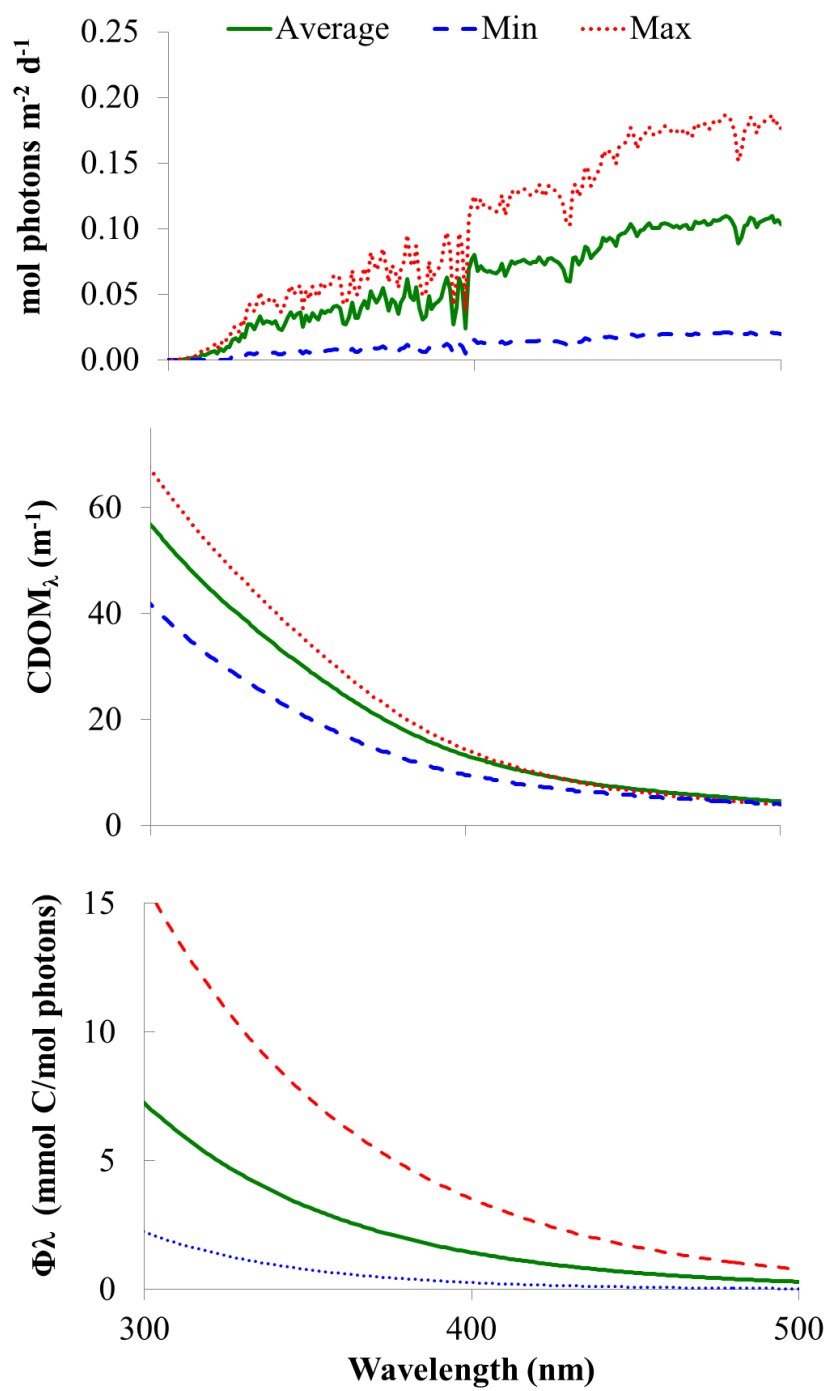

**Fig. S2.** Average, minimum, and maximum spectra of incident UV light (daily photon flux), CDOM, and apparent quantum yield of photo-mineralization measured in Innavait Creek.

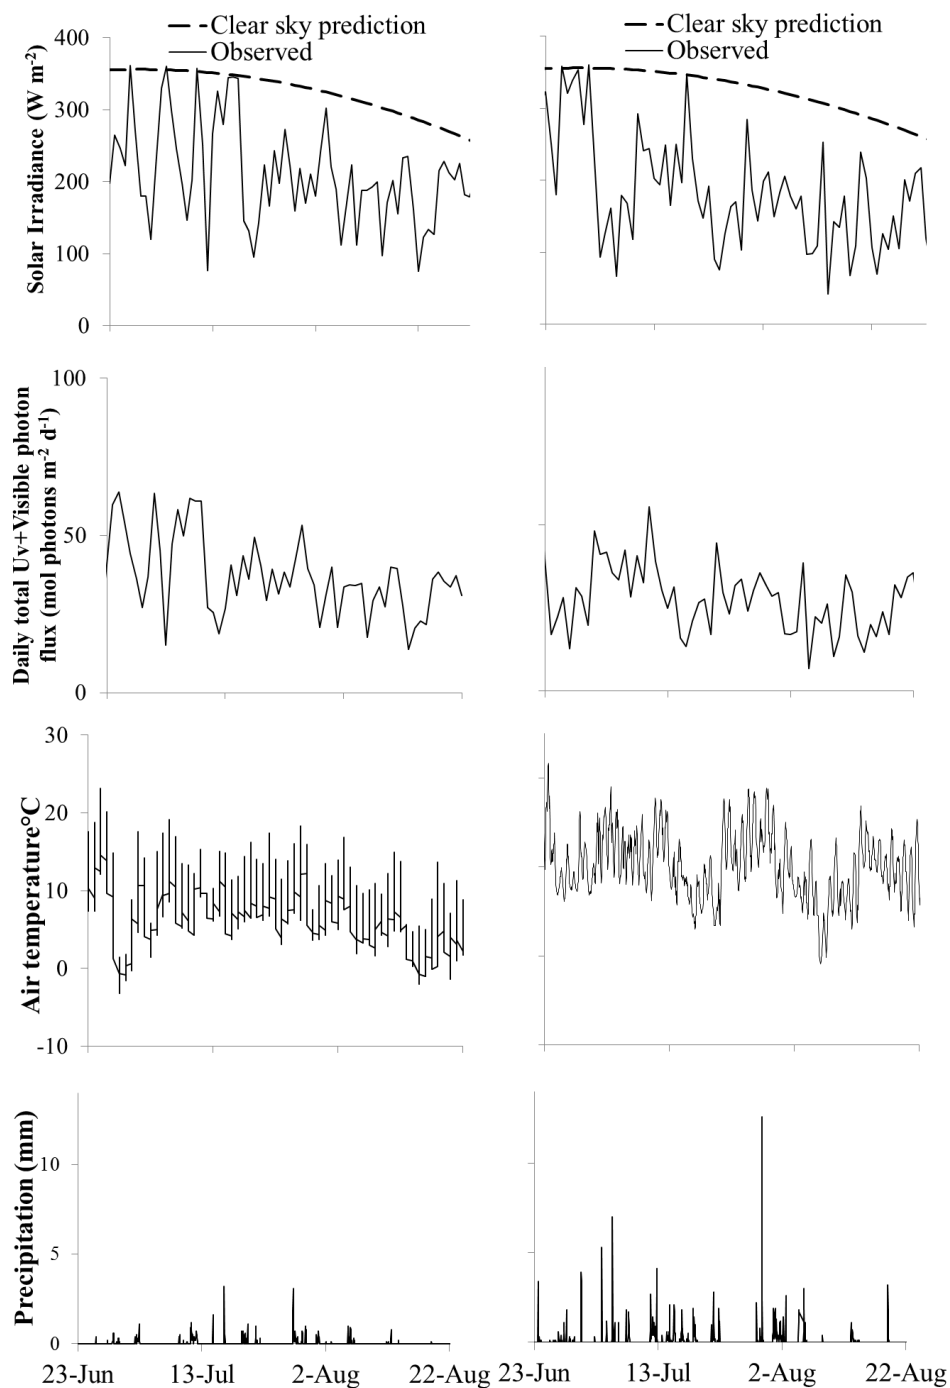

**Fig. S3.** UV and climate data at Imnavait Creek for 2011 (left) and 2012 (right) during the study periods. (A) Predicted and observed mean daily global solar irradiance. (B) Daily total sum of UV+ Visible photon flux reaching water surface. (C) Air temperature measured 1m above ground at Imnavait Creek. (D) Precipitation.
